# Supplementary material for: Probing intrinsic defects of aluminium-doped CuO thin films for solar cell applications
Source: Royal Society of Chemistry journal article supplement (doi:10.1039/d4ra06413e), 2024-01-01
Supplement: d4ra06413e1.pdf [file d4ra06413e1.pdf]

## Probing Intrinsic Defects Developed in Aluminium Doped CuO Thin Films for Solar Cell Applications

Adithya Prakash, Vikash Mishra and Mahesha M G \*

*Department of Physics, Manipal Institute of Technology, Manipal Academy of Higher Education  
576104, India*

\*Corresponding Author.

Email: [mahesha.mg@manipal.edu](mailto:mahesha.mg@manipal.edu)

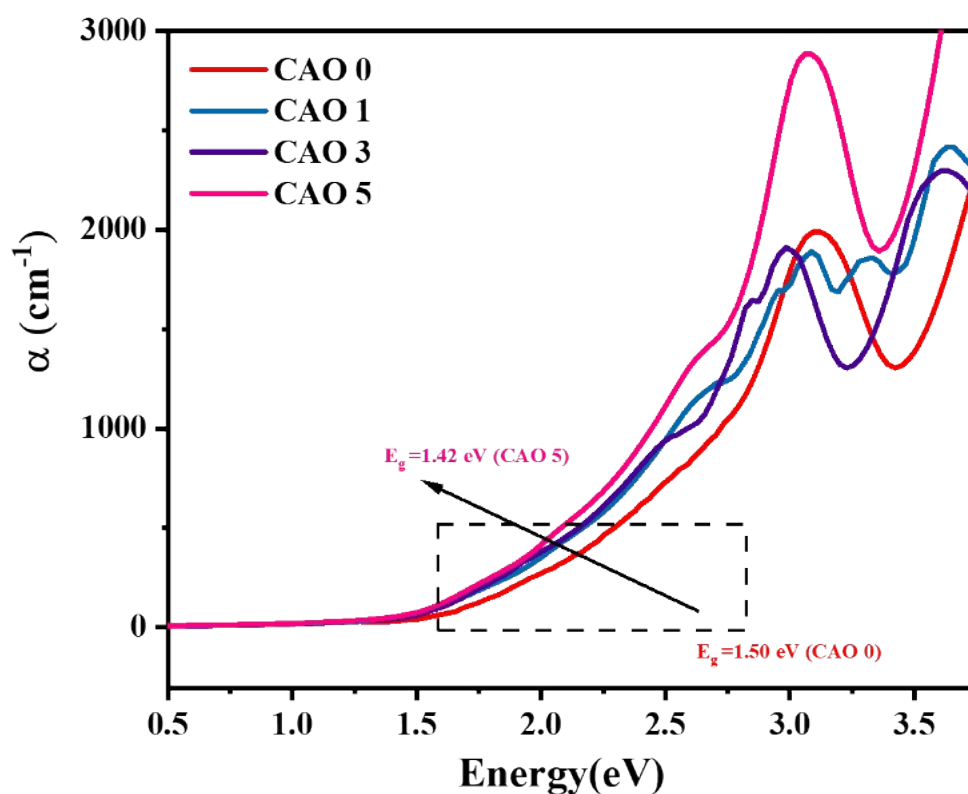

*Fig S1: Simulated optical absorption spectra of Al doped CuO.*

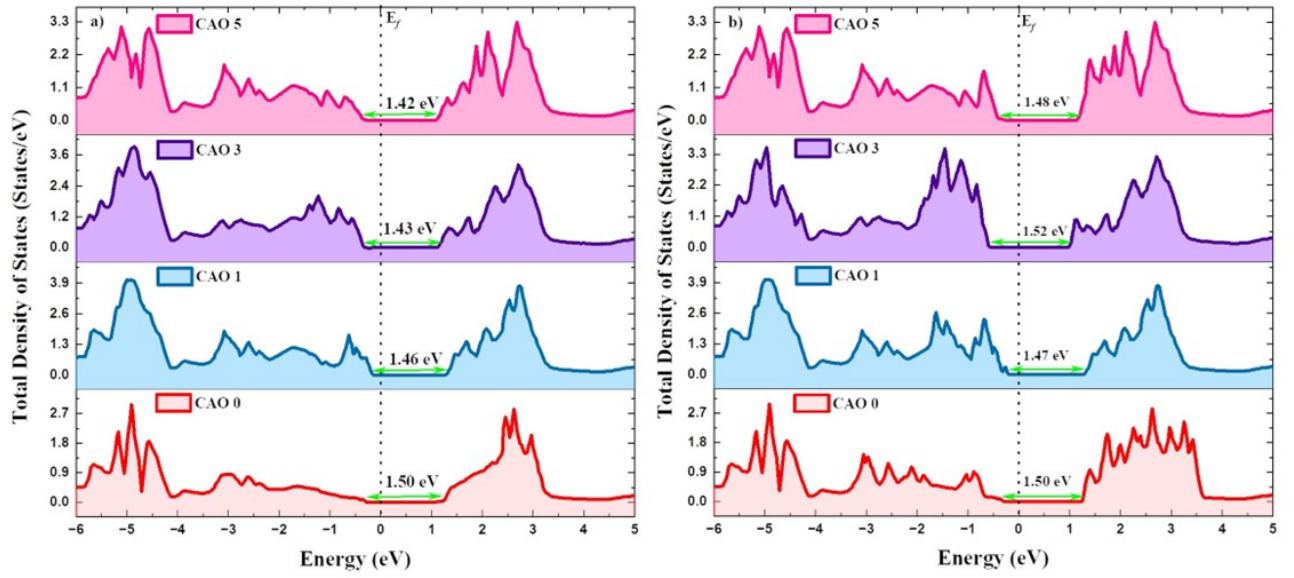

**Fig S2: Total density of states of CAO 0, CAO 1, CAO 3 and CAO 5 a) without defects and b) with  $O_i$  defects.**
